# Supplementary material for: Induction of a Compensatory Photosynthetic Response Mechanism in Tomato Leaves upon Short Time Feeding by the Chewing Insect Spodoptera exigua
Source: MDPI journal article supplement (doi:10.3390/insects12060562), 2021-06-18
Supplement: s1 [file s1]

# Induction of a Compensatory Photosynthetic Response Mechanism in Tomato Leaves Upon Short Time Feeding by the Chewing Insect *Spodoptera exigua*

Julietta Moustaka <sup>1</sup>, Nicolai Vitt Meyling <sup>1</sup> and Thure Pavlo Hauser <sup>1\*</sup>

**Table S1.** P-values of the paired Student's t test performed between the whole leaflet's AOIs at all different time points for the Quantum Yields:  $\Phi_{PSII}$ ,  $\Phi_{NPQ}$ ,  $\Phi_{NO}$ .

| Quantum Yields | $\Phi_{PSII}$ |       |          |       | $\Phi_{NPQ}$ |       |          |       | $\Phi_{NO}$ |       |         |       |
|----------------|---------------|-------|----------|-------|--------------|-------|----------|-------|-------------|-------|---------|-------|
|                | Before        | 15 m  | 90 m     | 180 m | Before       | 15 m  | 90 m     | 180 m | Before      | 15 m  | 90 m    | 180 m |
| Before         |               |       |          |       |              |       |          |       |             |       |         |       |
| 15 m           | 5.80783E-05   |       |          |       | 2.45E-08     |       |          |       | 0.283       |       |         |       |
| 90 m           | 0.054         | 0.740 |          |       | 1.52E-05     | 0.096 |          |       | 0.020       | 0.017 |         |       |
| 180 m          | 0.294         | 0.004 | 2.17E-06 |       | 0.858        | 0.014 | 2.86E-11 |       | 0.191       | 0.571 | 1.5E-06 |       |

**Table S2.** P-values of the paired Student's t test performed between all different zones at all different time points for the Effective quantum yield of PSII photochemistry,  $\Phi_{PSII}$ .

| $\Phi_{PSII}$      | Before   | 15 m rest | 15 m surrounding | 15 m feeding spot | 90 m rest | 90 m surrounding | 90 m feeding spot | 180 m rest | 180 m surrounding | 180 m feeding spot |
|--------------------|----------|-----------|------------------|-------------------|-----------|------------------|-------------------|------------|-------------------|--------------------|
| 15min rest         | 1.94E-07 |           |                  |                   |           |                  |                   |            |                   |                    |
| 15min surrounding  | 0.004    | 0.029     |                  |                   |           |                  |                   |            |                   |                    |
| 15min feeding      | 0.018    | 0.008     | 0.011            |                   |           |                  |                   |            |                   |                    |
| 90min rest         | 0.000    | 0.656     | 0.452            | 0.004             |           |                  |                   |            |                   |                    |
| 90min surrounding  | 0.014    | 0.048     | 0.889            | 0.001             | 0.539     |                  |                   |            |                   |                    |
| 90min feeding      | 0.050    | 0.076     | 0.011            | 0.672             | 0.025     | 0.022            |                   |            |                   |                    |
| 180min rest        | 0.369    | 0.012     | 0.240            | 0.005             | 3.56E-08  | 0.092            | 0.041             |            |                   |                    |
| 180min surrounding | 0.237    | 0.690     | 0.213            | 0.353             | 0.035     | 0.002            | 0.026             | 0.367      |                   |                    |
| 180min feeding     | 0.049    | 0.064     | 0.003            | 0.003             | 0.027     | 0.015            | 0.312             | 0.047      | 0.027             |                    |

**Table S3.** P-values of the paired Student's t test performed between all different zones at all different time points for the Quantum yield of regulated non photochemical energy loss in PSII,  $\Phi_{NPQ}$ .

| $\Phi_{NPQ}$      | Before   | 15 m rest | 15 m surrounding | 15 m feeding spot | 90 m rest | 90 m surrounding | 90 m feeding spot | 180 m rest | 180 m surrounding | 180 m feeding spot |
|-------------------|----------|-----------|------------------|-------------------|-----------|------------------|-------------------|------------|-------------------|--------------------|
| 15m rest          | 2.56E-08 |           |                  |                   |           |                  |                   |            |                   |                    |
| 15m surrounding   | 0.001    | 0.006     |                  |                   |           |                  |                   |            |                   |                    |
| 15m feeding       | 0.002    | 0.004     | 0.637            |                   |           |                  |                   |            |                   |                    |
| 90 m rest         | 0.007    | 0.461     | 0.540            | 0.983             |           |                  |                   |            |                   |                    |
| 90 m surrounding  | 0.002    | 0.010     | 0.881            | 0.849             | 0.633     |                  |                   |            |                   |                    |
| 90 m feeding      | 0.010    | 0.011     | 0.982            | 0.274             | 0.321     | 0.326            |                   |            |                   |                    |
| 180 m rest        | 0.252    | 0.012     | 0.090            | 0.146             | 5.52E-10  | 0.024            | 0.065             |            |                   |                    |
| 180 m surrounding | 0.047    | 0.388     | 0.135            | 0.138             | 0.011     | 0.001            | 0.177             | 0.525      |                   |                    |
| 180m feeding      | 0.052    | 0.071     | 0.787            | 0.266             | 0.168     | 0.283            | 0.285             | 0.348      | 0.525             |                    |

**Table S4.** P-values of the paired Student's t test performed between all different zones at all different time points for the Quantum yield of non-regulated energy loss in PSII,  $\Phi_{NO}$ .

| $\Phi_{NO}$        | Before   | 15 m rest | 15 m surrounding | 15 m feeding spot | 90 m rest | 90 m surrounding | 90 m feeding spot | 180 m rest | 180 m surrounding | 180 m feeding spot |
|--------------------|----------|-----------|------------------|-------------------|-----------|------------------|-------------------|------------|-------------------|--------------------|
| 15min rest         | 0.673352 |           |                  |                   |           |                  |                   |            |                   |                    |
| 15min surrounding  | 1.37E-05 | 4.23E-04  |                  |                   |           |                  |                   |            |                   |                    |
| 15min feeding      | 0.005    | 0.005     | 0.009            |                   |           |                  |                   |            |                   |                    |
| 90min rest         | 0.537    | 0.158     | 0.906            | 0.012             |           |                  |                   |            |                   |                    |
| 90min surrounding  | 2.38E-04 | 0.002     | 0.791            | 0.014             | 0.895     |                  |                   |            |                   |                    |
| 90min feeding      | 0.023    | 0.033     | 0.042            | 0.489             | 0.030     | 0.037            |                   |            |                   |                    |
| 180min rest        | 0.187    | 0.048     | 0.003            | 0.009             | 2.55E-06  | 0.007            | 0.028             |            |                   |                    |
| 180min surrounding | 0.002    | 0.043     | 0.021            | 0.009             | 0.043     | 0.014            | 0.031             | 0.117      |                   |                    |
| 180min feeding     | 0.037    | 0.055     | 0.073            | 0.270             | 0.051     | 0.067            | 0.095             | 0.045      | 0.052             |                    |

**Table S5.** P-values of the paired Student's t test performed between all different zones at all different time points for the Non Photochemical Quenching, NPQ.

| <b>NPQ</b>         | <b>Before</b> | <b>15 m rest</b> | <b>15 m surrounding</b> | <b>15 m feeding spot</b> | <b>90 m rest</b> | <b>90 m surrounding</b> | <b>90 m feeding spot</b> | <b>180 m rest</b> | <b>180 m surrounding</b> | <b>180 m feeding spot</b> |
|--------------------|---------------|------------------|-------------------------|--------------------------|------------------|-------------------------|--------------------------|-------------------|--------------------------|---------------------------|
| 15min rest         | 6.71E-07      |                  |                         |                          |                  |                         |                          |                   |                          |                           |
| 15min surrounding  | 9.70E-05      | 0.002            |                         |                          |                  |                         |                          |                   |                          |                           |
| 15min feeding      | 3.63E-04      | 0.001            | 0.047                   |                          |                  |                         |                          |                   |                          |                           |
| 90min rest         | 0.024         | 0.327            | 0.594                   | 0.094                    |                  |                         |                          |                   |                          |                           |
| 90min surrounding  | 0.000         | 0.003            | 0.865                   | 0.088                    | 0.735            |                         |                          |                   |                          |                           |
| 90min feeding      | 0.004         | 0.010            | 0.208                   | 0.364                    | 0.051            | 0.100                   |                          |                   |                          |                           |
| 180min rest        | 0.293         | 0.013            | 0.039                   | 0.017                    | 1.40E-10         | 0.011                   | 0.011                    |                   |                          |                           |
| 180min surrounding | 0.007         | 0.183            | 0.094                   | 0.014                    | 0.007            | 0.001                   | 0.031                    | 0.883             |                          |                           |
| 180min feeding     | 0.022         | 0.049            | 0.453                   | 0.297                    | 0.329            | 0.477                   | 0.205                    | 0.060             | 0.140                    |                           |

**Table S6.** P-values of the paired Student's t test performed between all different zones at all different time points for the Electron Transport Rate, ETR.

| <b>ETR</b>         | <b>Before</b> | <b>15 m rest</b> | <b>15 m surrounding</b> | <b>15 m feeding spot</b> | <b>90 m rest</b> | <b>90 m surrounding</b> | <b>90 m feeding spot</b> | <b>180 m rest</b> | <b>180 m surrounding</b> | <b>180 m feeding spot</b> |
|--------------------|---------------|------------------|-------------------------|--------------------------|------------------|-------------------------|--------------------------|-------------------|--------------------------|---------------------------|
| 15min rest         | 3.42E-09      |                  |                         |                          |                  |                         |                          |                   |                          |                           |
| 15min surrounding  | 0.004         | 0.029            |                         |                          |                  |                         |                          |                   |                          |                           |
| 15min feeding      | 0.018         | 0.008            | 0.015                   |                          |                  |                         |                          |                   |                          |                           |
| 90min rest         | 3.70E-04      | 0.658            | 0.452                   | 0.005                    |                  |                         |                          |                   |                          |                           |
| 90min surrounding  | 0.013         | 0.048            | 0.885                   | 0.001                    | 0.549            |                         |                          |                   |                          |                           |
| 90min feeding      | 0.051         | 0.075            | 0.011                   | 0.668                    | 0.025            | 0.021                   |                          |                   |                          |                           |
| 180min rest        | 0.372         | 0.012            | 0.239                   | 0.005                    | 3.77E-08         | 0.095                   | 0.042                    |                   |                          |                           |
| 180min surrounding | 0.238         | 0.694            | 0.213                   | 0.003                    | 0.036            | 0.002                   | 0.026                    | 0.373             |                          |                           |
| 180min feeding     | 0.050         | 0.063            | 0.003                   | 0.351                    | 0.027            | 0.015                   | 0.312                    | 0.048             | 0.028                    |                           |

**Table S7.** P-values of the paired Student's t test performed between all different zones at all different time points for the Efficiency of open PSII reaction centers  $F_v'/F_m'$ .

| $F_v'/F_m'$        | Before   | 15 m rest | 15 m surrounding | 15 m feeding spot | 90 m rest | 90 m surrounding | 90 m feeding spot | 180 m rest | 180 m surrounding | 180 m feeding spot |
|--------------------|----------|-----------|------------------|-------------------|-----------|------------------|-------------------|------------|-------------------|--------------------|
| 15min rest         | 5.45E-05 |           |                  |                   |           |                  |                   |            |                   |                    |
| 15min surrounding  | 0.456    | 0.350     |                  |                   |           |                  |                   |            |                   |                    |
| 15min feeding      | 0.064    | 0.075     | 0.036            |                   |           |                  |                   |            |                   |                    |
| 90min rest         | 0.012    | 0.027     | 0.281            | 0.155             |           |                  |                   |            |                   |                    |
| 90min surrounding  | 0.112    | 0.099     | 0.329            | 0.004             | 0.181     |                  |                   |            |                   |                    |
| 90min feeding      | 0.068    | 0.088     | 0.146            | 0.969             | 0.185     | 0.031            |                   |            |                   |                    |
| 180min rest        | 0.101    | 0.542     | 0.118            | 0.129             | 3.62E-05  | 0.067            | 0.175             |            |                   |                    |
| 180min surrounding | 0.790    | 0.628     | 0.808            | 0.013             | 0.536     | 0.010            | 0.054             | 0.203      |                   |                    |
| 180min feeding     | 0.064    | 0.083     | 0.164            | 0.924             | 0.190     | 0.027            | 0.575             | 0.181      | 0.056             |                    |

**Table S8.** P-values of the paired Student's t test performed between all different zones at all different time points for the Photochemical Quenching,  $q_P$ .

| $q_P$              | Before   | 15 m rest | 15 m surrounding | 15 m feeding spot | 90 m rest | 90 m surrounding | 90 m feeding spot | 180 m rest | 180 m surrounding | 180 m feeding spot |
|--------------------|----------|-----------|------------------|-------------------|-----------|------------------|-------------------|------------|-------------------|--------------------|
| 15min rest         | 5.68E-08 |           |                  |                   |           |                  |                   |            |                   |                    |
| 15min surrounding  | 0.033    | 0.131     |                  |                   |           |                  |                   |            |                   |                    |
| 15min feeding      | 0.022    | 0.005     | 0.024            |                   |           |                  |                   |            |                   |                    |
| 90min rest         | 0.628    | 0.409     | 0.212            | 0.003             |           |                  |                   |            |                   |                    |
| 90min surrounding  | 0.055    | 0.197     | 0.647            | 0.004             | 0.099     |                  |                   |            |                   |                    |
| 90min feeding      | 0.070    | 0.095     | 0.024            | 0.545             | 0.003     | 0.030            |                   |            |                   |                    |
| 180min rest        | 0.146    | 0.019     | 0.927            | 0.003             | 2.93E-09  | 0.700            | 0.013             |            |                   |                    |
| 180min surrounding | 0.226    | 0.770     | 0.185            | 0.005             | 0.012     | 0.009            | 0.028             | 0.090      |                   |                    |
| 180min feeding     | 0.088    | 0.067     | 0.010            | 0.176             | 0.002     | 0.020            | 0.246             | 0.011      | 0.024             |                    |
